# Supplementary material
Source: publisher figshare collection journal article supplement (https://acs.figshare.com/ndownloader/files/13664534)
Supplement: Supplementary file 1 [file 13664534]

# The cost of long catalytic loops in folding and stability of the ALS-associated protein SOD1

FAN YANG <sup>1</sup>, HUABING WANG <sup>1</sup>, DEREK T. LOGAN <sup>2</sup>, XIN MU <sup>1</sup>, JENS DANIELSSON <sup>1</sup> AND MIKAEL OLIVEBERG <sup>1</sup> \*

*Fitting of chevron plots including curved unfolding limb.* From the chevron data of apoSOD1<sup>66+32</sup> it is apparent that protein shifts between an early and late transition-state ( $\ddagger' \rightarrow \ddagger''$ ) at high urea concentration, yielding a downward kink of the unfolding limb,  $\log k_u^{\text{H}_2\text{O}} + m_u[\text{urea}]$  in manuscript Eq. 5 was expanded to <sup>1</sup>

$$\log k_{u, \text{obs}} = \log k_u^{\text{H}_2\text{O}} + m_u[\text{urea}] - \log(1 + K_{\text{part}} 10^{m''[\text{urea}]}), \quad (\text{Eq. S1})$$

where  $K_{\text{part}} = [\ddagger'] / [\ddagger'']$  is the equilibrium constant between the two transition-states  $\ddagger'$  and  $\ddagger''$ , respectively, and

$$\log K_{\text{part}} = (\log k_u - \log k_{u''}), \quad (\text{Eq. S2})$$

where  $\log k_u = \log k_u^{\text{H}_2\text{O}} + m_u[\text{urea}]$  (c.f. Eq. 3) and  $\log k_{u''} = \log k_u^{\text{H}_2\text{O}} + m_{u''}[\text{urea}]$  are the rate constants for unfolding over  $\ddagger'$  and  $\ddagger''$ , respectively, and  $m'' = m_u - m_{u''}$ . Notably,  $\log k_u$  is here equivalent to  $\log k_u$  in manuscript Eq. 5, i.e. unfolding over the dominant  $\ddagger'$ , captured by a v-shaped fit. The parameters for apoSOD1<sup>66+32</sup> yielded by Eq. S2 are given in manuscript Table 1.

*Fitting of folding rates of low stability proteins.* For  $\phi$ -value mutations where low unfolding midpoints prevents accurate fitting of the chevron refolding limb, i.e. L117A and V119A of apoSOD<sup>33+16</sup>,  $k_f$  was estimated from  $k_u$  and the unfolding amplitudes by the following relationship:  $K_{\text{D-N}} = k_u/k_f = [\text{D}]/[\text{N}]$ , where  $[\text{D}]$  and  $[\text{N}]$  were derived from the sigmoidal plots of the unfolding amplitudes vs.  $[\text{urea}]$  in the unfolding transition region <sup>2</sup>.

## SI Tables

Table S1. Statistics of crystallographic data, processing and refinement. Values in parentheses are for the highest resolution shell, and  $R_{\text{free}}$  was calculated with 5.1 % of the reflections excluded in refinement.

|                                       |                        |
|---------------------------------------|------------------------|
| <b>Data processing</b>                |                        |
| Space Group                           | <i>H32</i>             |
| Cell dimensions                       |                        |
| <i>a</i> , <i>b</i> , <i>c</i> (Å)    | 83.21, 83.21, 133.48   |
| $\alpha$ , $\beta$ , $\gamma$ (°)     | 90.0, 90.0, 120.0      |
| Resolution (Å)                        | 63.41–1.79 (1.83–1.79) |
| Unique reflections                    | 16779 (810)            |
| Completeness (%)                      | 98.7 (80.6)            |
| Multiplicity                          | 9.6 (6.6)              |
| <i>I</i> / $\sigma$ <i>I</i>          | 20.1 (2.4)             |
| $R_{\text{merge}}$                    | 0.081 (0.746)          |
| <b>Refinement</b>                     |                        |
| Resolution (Å)                        | 63.41–1.79 (1.84–1.79) |
| $R_{\text{work}}$                     | 0.177 (0.272)          |
| $R_{\text{free}}$                     | 0.203 (0.262)          |
| Protein atoms                         | 837                    |
| Water atoms                           | 61                     |
| Glycerol atoms                        | 6                      |
| Sulfate ion                           | 5                      |
| R.m.s. deviation                      |                        |
| Bond lengths (Å)                      | 0.025                  |
| Angles (°)                            | 2.411                  |
| Mean <i>B</i> value (Å <sup>2</sup> ) | 31.4                   |
| Ramachandran plot                     |                        |
| Most favoured (%)                     | 96.5                   |
| Allowed (%)                           | 3.5                    |

Disallowed (%) 0.0

---

Table S2. Parameters ( $c^{\text{Eq.}}$  and  $c^{\text{kin.}}$ ) from linear fits of data Figure S3, plot shown in Figure 7B.

|       | $c^{\text{Eq.}}$ | $c^{\text{kin.}}$ |
|-------|------------------|-------------------|
| I18V  | 1.41±0.02        | 1.02±0.15         |
| I35V  | 1.14±0.05        | 0.96±0.02         |
| F45A  | 1.34±0.19        | 1.88±0.051        |
| V47A  | 1.07±0.05        | 1.24±0.10         |
| L117A | 1.08±0.20        | 0.89±0.18         |
| V119A | 1.15±0.22        | 0.70±0.24         |

Table S3. Parameters ( $c^{\text{Eq.*}}$ ,  $c^{\text{kin.*}}$  and  $\alpha$ -value) from linear fits of data Figure S4.

|       | $c^{\text{Eq.*}}$ | $c^{\text{kin.*}}$ | $\alpha$  |
|-------|-------------------|--------------------|-----------|
| pwt   | 0.061±0.003       | 0.021±0.002        | 0.34±0.02 |
| I18V  | 0.070±0.007       | 0.019±0.004        | 0.28±0.03 |
| I35V  | 0.056±0.004       | 0.018±0.001        | 0.32±0.01 |
| F45A  | 0.068±0.002       | 0.036±0.001        | 0.53±0.03 |
| V47A  | 0.053±0.004       | 0.023±0.003        | 0.44±0.03 |
| L117A | 0.056±0.003       | 0.017±0.002        | 0.31±0.02 |
| V119A | 0.059±0.004       | 0.014±0.004        | 0.24±0.05 |

## SI Figures and Legends

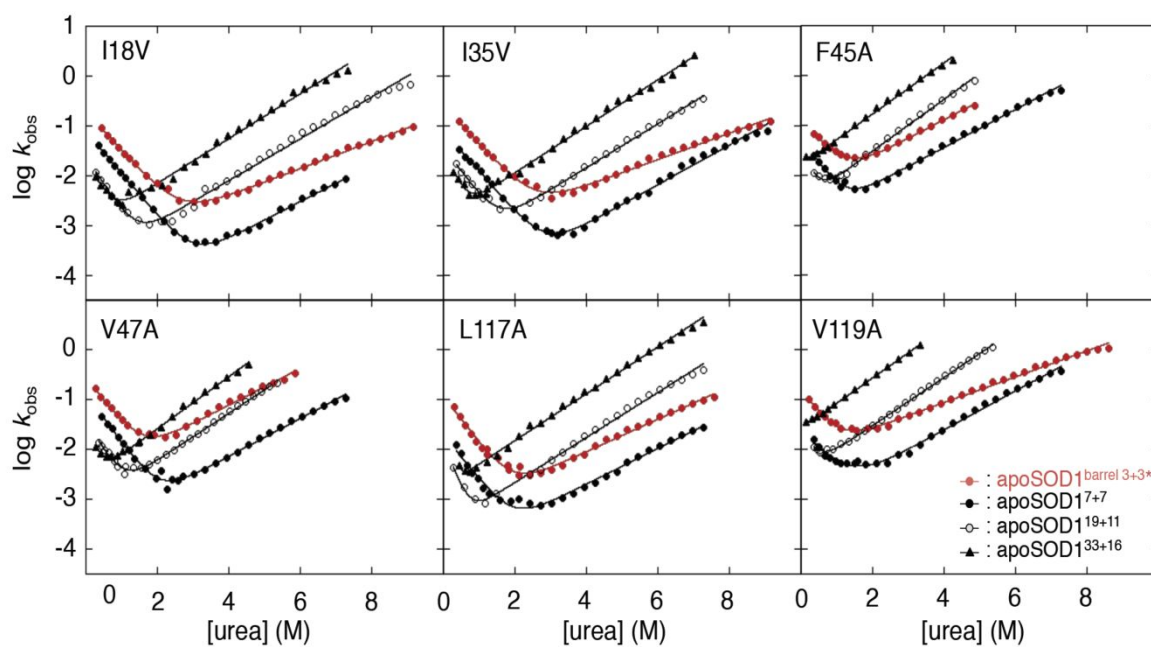

Figure S1. The folding and unfolding kinetics of the apoSOD1  $\phi$ -value mutations, where  $k_{\text{obs}}$  is in units of  $\text{s}^{-1}$ . The parameters obtained by fitting of manuscript Eq. 5 are shown in manuscript Table 4.

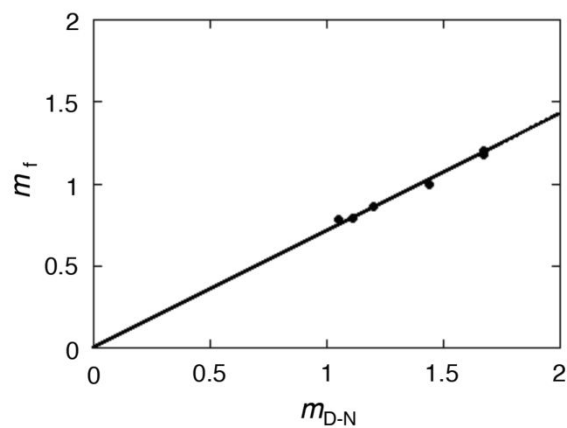

Figure S2. The plot of  $m_f$  vs.  $m_{D-N}$  shows a linear relationship with  $\beta^\ddagger = m_f / m_{D-N} = 0.71$ , and suggests no transition-state movement following loop extension. Values are from Table 1.

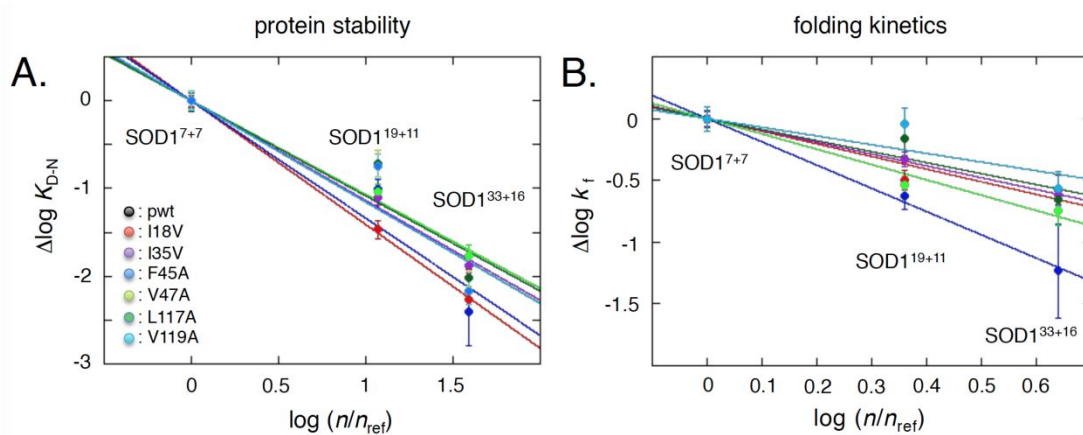

Figure S3. Effects on the apoSOD1  $\phi$ -value mutations on stability ( $\log K_{D-N}$ , Eq. 2) and refolding kinetics ( $\log k_f$ , Eq. 3) upon loop-length alteration ( $\log n/n_{ref}$ , Eq. 4). The slopes  $c^{Eq.}$  and  $c^{kin.}$  are shown in Figure 7B and Table S3. **A.** Effects on protein stability. **B.** Effects on refolding kinetics.

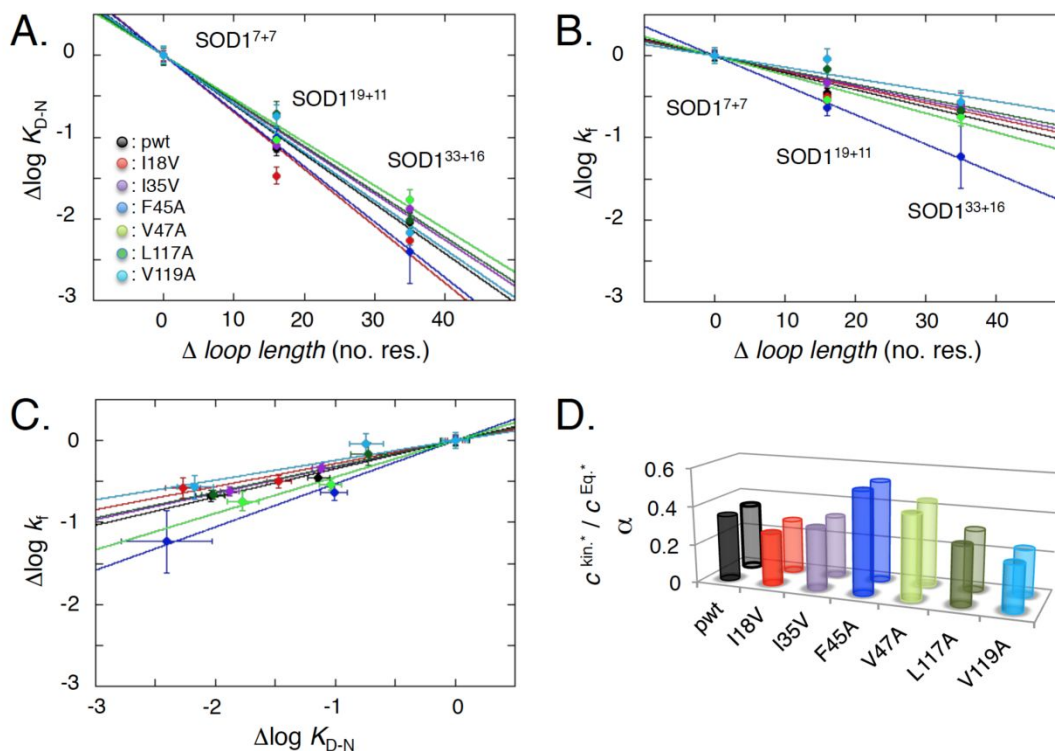

Figure S4. Mutational effects on the apoSOD1 loop-length titration, and derivation of Leffler  $\alpha$ . Loop lengths are plotted in linear scale to allow with results in previous studies. Colour coding as in Panel D. **A.**  $\Delta \log K_{D-N}$  vs.  $\Delta \text{loop length}$ , i.e. number of residues, where the slopes denote  $c^{\text{kin.}*}$ . **B.**  $\Delta \log k_f$  vs.  $\Delta \text{loop length}$ , where the slopes denote  $c^{\text{Eq.}*}$ . **C.**  $\Delta \log k_f$  vs.  $\Delta \log K_{D-N}$  plots, where the slopes represent the Leffler  $\alpha$  values<sup>3</sup>. **D.** Comparison of the values of  $c^{\text{kin.}*} / c^{\text{Eq.}*}$  derived from panels A and B (front bars), and the Leffler  $\alpha$  values derived from panel D (rear bars). Values are shown in Table S3.

## SI References

1. Wang, H.; Lang, L.; Logan, D. T.; Danielsson, J.; Oliveberg, M., Tricking a Protein To Swap Strands. *Journal of the American Chemical Society* **2016**, *138* (48), 15571–15579.
2. Nordlund, A.; Oliveberg, M., Folding of Cu/Zn superoxide dismutase suggests structural hotspots for gain of neurotoxic function in ALS: parallels to precursors in

amyloid disease. *Proceedings of the National Academy of Sciences of the United States of America* **2006**, 103 (27), 10218-23.

3. Sanchez, I. E., Protein folding transition states probed by loop extension. *Protein science : a publication of the Protein Society* **2008**, 17 (1), 183-6.
